# Supplementary material for: Phenolic Secondary Metabolites and Antiradical and Antibacterial Activities of Different Extracts of Usnea barbata (L.) Weber ex F.H.Wigg from Călimani Mountains, Romania
Source: MDPI journal article supplement (doi:10.3390/ph15070829), 2022-07-04
Supplement: s1 [file s1]

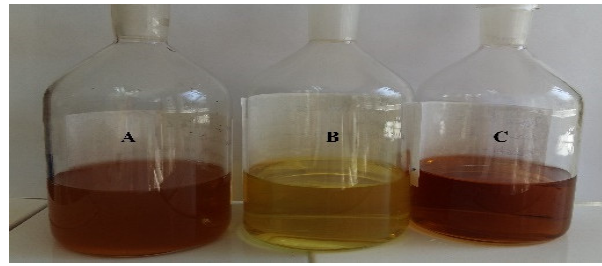

(a)

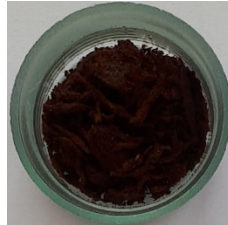

(b)

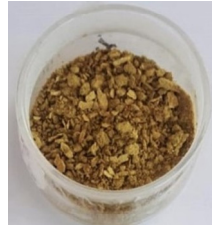

(c)

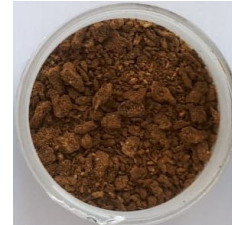

(d)

**Figure S1.** (a). *U. barbata* fluid extracts: A. *mUBW*, B. *mUBA*, C. *mUBE*; (b-d) *U. barbata* dry extracts: (b) *dUBW*, (c) *dUBA*, (d) *dUBE*.

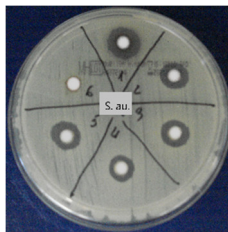

(a)

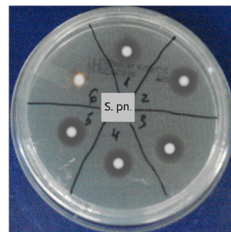

(b)

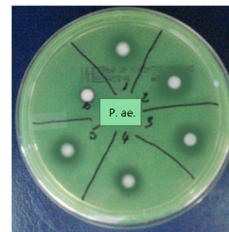

(c)

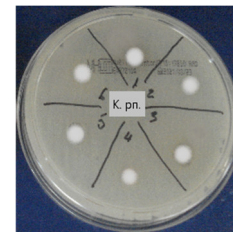

(d)

**Figure S2.** Antibacterial activity of usnic acid (1) and *U. barbata* extracts: *mUBA* (2), *dUBA* (3), *mUBE* (4), *dUBE* (5), *mUBW* (6), on *S. aureus* (a), *S. pneumoniae* (b), *P. aeruginosa* (c), *K. pneumoniae* (d).

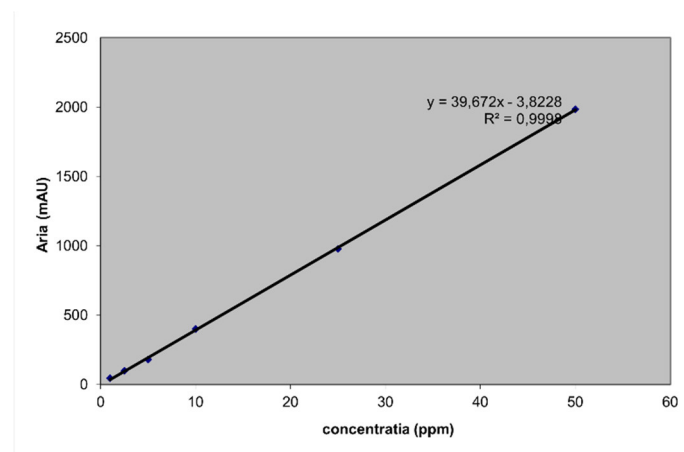

**Figure S3.** Calibration curve for usnic acid

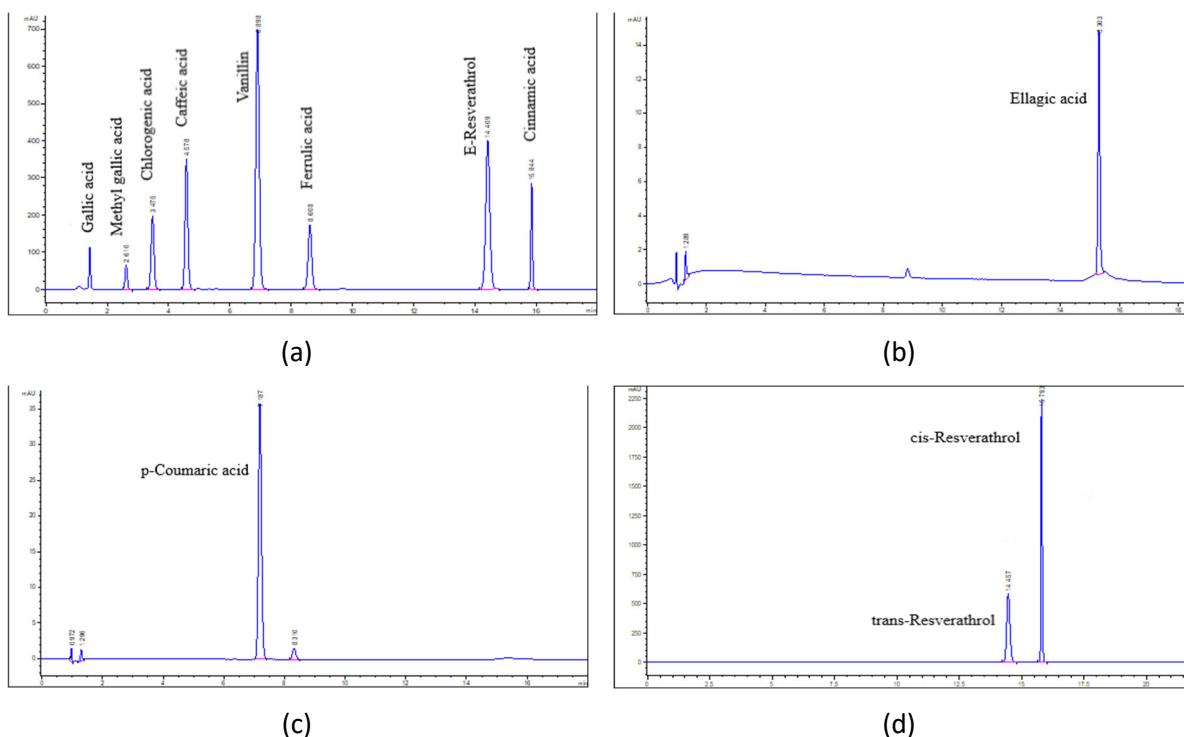

**Figure S4.** Polyphenols standards: mixture (a), ellagic acid (b), p-coumaric acid (c), cis-resveratrol and trans-resveratrol (d).

**Table S1.** Concentration, retention time, and correlation coefficient ( $R^2$ ) values for all phenolic standards used in the HPLC-DAD method

| Phenolic compound             | Concentration (mg/mL) | Retention Time (min) | $R^2$ |
|-------------------------------|-----------------------|----------------------|-------|
| <i>trans</i> -Resveratrol (E) | 0.22                  | 14.467 ± 0.017       | 0.999 |
| <i>cis</i> - Resveratrol (Z)  | 0.37                  | 15.751 ± 0.058       | 0.997 |
| Chlorogenic acid              | 0.37                  | 3.501 ± 0.015        | 0.999 |
| Caffeic acid                  | 0.36                  | 4.598 ± 0.036        | 0.996 |
| Cinnamic acid                 | 0.58                  | 15.867 ± 0.007       | 0.998 |
| Vanillin                      | 0.42                  | 6.919 ± 0.051        | 0.996 |
| Gallic acid                   | 0.39                  | 0.990 ± 0.025        | 0.995 |
| Ferrulic acid                 | 0.38                  | 8.565 ± 0.058        | 0.998 |
| Ellagic acid                  | 0.40                  | 15.303 ± 0.027       | 0.998 |
| <i>p</i> -Coumaric acid       | 0.41                  | 7.187 ± 0.019        | 0.997 |
| 3 - Methyl gallic acid        | 0.51                  | 2.606 ± 0.008        | 0.995 |
